# Supplementary material for: Distances from ligands as main predictive features for pathogenicity and functional effect of variants in NMDA receptors
Source: bioRxiv or medRxiv preprint supplement (doi:10.1101/2024.05.06.24306939), 2024-05-08
Supplement: Supplementary file [file media-2.pdf]

Supplemental Table S2: Missense variants for which analysis needed for GoF or LoF call described by Myers et al. (2023) is complete

| Gene          | Residue Position | WT Amino Acid | Variant Amino Acid | Call for this paper | Formal Call by Myers et al criteria | ClinVar                    | PMID                                   | Reference                               |
|---------------|------------------|---------------|--------------------|---------------------|-------------------------------------|----------------------------|----------------------------------------|-----------------------------------------|
| <i>GRIN1</i>  | 531              | Lys           | Arg                | Decrease            | Likely LoF*                         | VCV002686033.1             | --                                     | this study                              |
| <i>GRIN1</i>  | 532              | Pro           | His                | Decrease            | Likely LoF                          | VCV000421469               | 34413877, 37369021                     | Zhang 2021, Myers 2023                  |
| <i>GRIN1</i>  | 548              | Arg           | Gln                | Increase            | Likely GoF                          | VCV000521298               | 37000222, 37369021                     | Xie 2023, Myers 2023                    |
| <i>GRIN1</i>  | 549              | Ser           | Arg                | Decrease            | Likely LoF                          | VCV000520575               | 37000222, 37369021                     | Xie 2023, Myers 2023                    |
| <i>GRIN1</i>  | 551              | Leu           | Pro                | Increase            | Likely GoF                          | --                         | 29365063, 37000222, 37369021           | Fry 2018; Xie 2023, Myers 2023          |
| <i>GRIN1</i>  | 556              | Gln           | Arg                | Increase            | Likely GoF                          | VCV000976358               | --                                     | this study                              |
| <i>GRIN1</i>  | 557              | Pro           | Leu                | Decrease            | Likely LoF*                         | VCV000372881               | 37000222                               | Xie 2023                                |
| <i>GRIN1</i>  | 557              | Pro           | Arg                | Increase            | Possible GoF                        | VCV000235846               | 28095420                               | this study, Ogden 2017                  |
| <i>GRIN1</i>  | 559              | Gln           | Arg                | Increase            | Possible GoF                        | --                         | 37000222, 37369021                     | Xie 2023, Myers 2023                    |
| <i>GRIN1</i>  | 637              | Ala           | Ser                | Increase            | Likely GoF                          | --                         | 38538865                               | Xu 2023                                 |
| <i>GRIN1</i>  | 637              | Ala           | Val                | Increase            | Possible GoF                        | VCV000452518               | 38538865                               | Xu 2023                                 |
| <i>GRIN1</i>  | 638              | Gly           | Ala                | Increase            | Likely GoF                          | VCV000975942.5             | 38538865                               | Xu 2023                                 |
| <i>GRIN1</i>  | 638              | Gly           | Val                | Increase            | Possible GoF                        | --                         | 38538865                               | Xu 2023                                 |
| <i>GRIN1</i>  | 638              | Gly           | Ser                | Increase            | Possible GoF                        | VCV001502674               | --                                     | this study                              |
| <i>GRIN1</i>  | 641              | Met           | Ile                | Increase            | Possible GoF                        | VCV000403957               | 25864721, 30355546, 37369021, 38538865 | Ohba 2015, Pironti 2018, Myers, Xu 2023 |
| <i>GRIN1</i>  | 641              | Met           | Leu                | Increase            | Likely GoF                          | VCV001700197               | 30355546, 38538865                     | Pironti 2018, Xu 2023                   |
| <i>GRIN1</i>  | 642              | Ile           | Leu                | Decrease            | Likely LoF                          | VCV000421935               | 38538865                               | Xu 2023                                 |
| <i>GRIN1</i>  | 642              | Ile           | Thr                | Decrease            | Possible LoF                        | --                         | 38538865                               | Xu 2023                                 |
| <i>GRIN1</i>  | 643              | Ala           | Val                | Increase            | Likely GoF                          | VCV000539837.6             | 38538865                               | Xu 2023                                 |
| <i>GRIN1</i>  | 644              | Val           | Met                | Increase            | Likely GoF                          | VCV000451906               | 38538865                               | Xu 2023                                 |
| <i>GRIN1</i>  | 645              | Ala           | Ser                | Increase            | Possible GoF                        | VCV000917873               | 27164704, 38538865                     | Lemke 2016, Xu 2023                     |
| <i>GRIN1</i>  | 650              | Asn           | Ile                | Increase            | Possible GoF                        | VCV000429784               | 38538865                               | Xu 2023                                 |
| <i>GRIN1</i>  | 650              | Asn           | Lys                | Increase            | Possible LoF                        | VCV000487502; VCV000487502 | 25864721, 38538865                     | Ohba 2015, Xu 2023                      |
| <i>GRIN1</i>  | 652              | Ala           | Thr                | Decrease            | Likely LoF                          | --                         | 38538865                               | Xu 2023                                 |
| <i>GRIN1</i>  | 653              | Ala           | Gly                | Increase            | Indeterminant                       | VCV000521282               | 27164704, 38538865                     | Lemke 2016, Xu 2023                     |
| <i>GRIN1</i>  | 653              | Ala           | Thr                | Increase            | Likely GoF                          | --                         | 35393335, 38538865                     | Brock 2023, Xu 2023                     |
| <i>GRIN1</i>  | 654              | Phe           | Cys                | Increase            | Likely GoF                          | VCV000559643               | 38538865                               | Xu 2023                                 |
| <i>GRIN1</i>  | 655              | Leu           | Gln                | Increase            | Likely GoF                          | VCV000561020               | 38538865                               | Xu 2023                                 |
| <i>GRIN1</i>  | 744              | Cys           | Gly                | Increase            | Likely GoF                          | --                         | --                                     | this study                              |
| <i>GRIN1</i>  | 806              | Ala           | Glu                | Increase            | Likely GoF                          | VCV000522682               | --                                     | this study                              |
| <i>GRIN1</i>  | 844              | Arg           | Leu                | Increase            | Possible GoF                        | VCV000598966               | --                                     | this study                              |
| <i>GRIN2A</i> | 483              | Gly           | Arg                | Decrease            | Likely LoF                          | VCV000812185               | 27839871, 28242877, 37369021           | Swanger 2016, Addis 2017, Myers 2023    |
| <i>GRIN2A</i> | 506              | Val           | Ala                | Increase            | Possible GoF                        | VCV000205650               | 27839871, 37369021                     | Swanger 2016, Myers 2023                |
| <i>GRIN2A</i> | 511              | Ser           | Leu                | Decrease            | Likely LoF*                         | VCV000080290               | --                                     | this study                              |
| <i>GRIN2A</i> | 518              | Arg           | His                | Decrease            | Likely LoF*                         | VCV000088732               | 27839871, 37369021                     | Swanger 2016, Myers 2023                |
| <i>GRIN2A</i> | 518              | Arg           | Cys                | Decrease            | Likely LoF*                         | VCV000205687               | --                                     | this study                              |
| <i>GRIN2A</i> | 531              | Thr           | Met                | Decrease            | Likely LoF*                         | VCV000088730               | 27839871, 37369021                     | Swanger 2016, Myers 2023                |
| <i>GRIN2A</i> | 545              | Ser           | Leu                | Decrease            | Possible LoF                        | --                         | 37000222, 37369021                     | Xie 2023, Myers 2023                    |
| <i>GRIN2A</i> | 548              | Ala           | Pro                | Decrease            | Likely LoF*                         | VCV000390621               | 37000222, 37369021                     | Xie 2023, Myers 2023                    |
| <i>GRIN2A</i> | 551              | Glu           | Lys                | Increase            | Likely GoF                          | VCV000520918               | 37000222, 37369021                     | Xie 2023, Myers 2023                    |
| <i>GRIN2A</i> | 552              | Pro           | Arg                | Increase            | Possible GoF                        | VCV000039663               | 28095420, 37369021                     | Ogden 2017, Myers 2023                  |
| <i>GRIN2A</i> | 554              | Ser           | Thr                | Increase            | Likely GoF                          | VCV001708207               | 37000222, 37369021                     | Xie 2023, Myers 2023                    |
| <i>GRIN2A</i> | 611              | Leu           | Gln                | Increase            | Likely GoF                          | VCV001325863               | 31429998, 37369021                     | Li 2019, Myers 2023                     |
| <i>GRIN2A</i> | 615              | Asn           | Lys                | Increase            | Possible GoF                        | VCV000029733               | 20890276, 31429998, 37369021           | Endele 2010, Li 2019, Myers 2023        |
| <i>GRIN2A</i> | 635              | Ala           | Thr                | Increase            | Likely GoF                          | VCV000985807.3             | 38538865                               | Xu 2023                                 |
| <i>GRIN2A</i> | 639              | Val           | Ile                | Increase            | Likely GoF                          | VCV001498958               | 38538865                               | Xu 2023                                 |
| <i>GRIN2A</i> | 642              | Leu           | Met                | Increase            | Possible GoF                        | VCV002499601.2             | 38538865                               | Xu 2023                                 |
| <i>GRIN2A</i> | 642              | Leu           | Arg                | Increase            | Possible GoF                        | VCV000985631               | 25590979, 38538865                     | Zhu 2015, Xu 2023                       |
| <i>GRIN2A</i> | 643              | Ala           | Asp                | Increase            | Possible GoF                        | VCV000243097               | 29644724, 38538865                     | Fernandez-Marmiesse 2018, Xu 2023       |
| <i>GRIN2A</i> | 644              | Ser           | Gly                | Increase            | Possible GoF                        | VCV001325864               | 32577763, 38538865                     | Amador 2020, Xu 2023                    |

|               |     |     |     |          |               |                 |                                        |                                                  |
|---------------|-----|-----|-----|----------|---------------|-----------------|----------------------------------------|--------------------------------------------------|
| <i>GRIN2A</i> | 646 | Thr | Ala | Increase | Possible GoF  | VCV000488524    | 28109652, 30544257, 38538865           | von Stulpnagel 2017, Strehlow 2019, Xu 2023      |
| <i>GRIN2A</i> | 646 | Thr | Arg | Increase | Likely GoF    | VCV000432031    | 38538865                               | Xu 2023                                          |
| <i>GRIN2A</i> | 648 | Asn | Ser | Decrease | Possible LoF  | VCV000205652    | 26633542, 30544257, 38538865           | Retterer 2016, Strehlow 2019, Xu 2023            |
| <i>GRIN2A</i> | 649 | Leu | Val | Increase | Possible GoF  | VCV000039662    | 23033978, 30544257, 38538865           | de Ligt 2012, Strehlow 2019, Xu 2023             |
| <i>GRIN2A</i> | 650 | Ala | Ser | Increase | Possible GoF  | VCV001021787.9  | 38538865                               | Xu 2023                                          |
| <i>GRIN2A</i> | 652 | Phe | Val | Decrease | Possible LoF  | VCV000088733    | 23933820, 38538865                     | Lesca 2013, Xu 2023                              |
| <i>GRIN2A</i> | 653 | Met | Ile | Increase | Indeterminant | VCV001325867    | 30544257, 38538865                     | Strehlow 2019, Xu 2023                           |
| <i>GRIN2A</i> | 653 | Met | Val | Increase | Possible GoF  | VCV001325866    | 30544257, 38538865                     | Strehlow 2019, Xu 2023                           |
| <i>GRIN2A</i> | 654 | Ile | Thr | Increase | Possible GoF  | VCV000941334    | 30544257, 38538865                     | Strehlow 2019, Xu 2023                           |
| <i>GRIN2A</i> | 690 | Thr | Met | Decrease | Likely LoF    | VCV000444362    | --                                     | this study                                       |
| <i>GRIN2A</i> | 694 | Ile | Thr | Decrease | Likely LoF    | VCV001325869    | 27839871                               | this study, Swanger 2016                         |
| <i>GRIN2A</i> | 695 | Arg | Gln | Increase | Likely GoF    | VCV000205689    | --                                     | this study                                       |
| <i>GRIN2A</i> | 705 | Met | Val | Decrease | Possible LoF  | VCV001325870    | 27839871, 37369021                     | Swanger 2016, Myers 2023                         |
| <i>GRIN2A</i> | 716 | Ala | Thr | Decrease | Likely LoF    | VCV000205656    | 27839871, 37369021                     | Swanger 2016, Myers 2023                         |
| <i>GRIN2A</i> | 716 | Ala | Asp | Decrease | Likely LoF*   | VCV000375534    | 23933820                               | this study, Lesca 2013,                          |
| <i>GRIN2A</i> | 731 | Asp | Asn | Decrease | Likely LoF    | VCV000205657    | 27839871, 28242877, 28182669, 37369021 | Swanger 2016, Addis 2017, Gao 2017, Myers 2023   |
| <i>GRIN2A</i> | 734 | Val | Leu | Decrease | Possible LoF  | VCV000433123    | 27839871, 37369021                     | Swanger 2016, Myers 2023                         |
| <i>GRIN2A</i> | 772 | Lys | Glu | Decrease | Likely LoF    | VCV001483207    | 23933819, 27839871                     | this study, Lemke 2013, Swanger 2016             |
| <i>GRIN2A</i> | 812 | Leu | Met | Increase | Likely GoF    | VCV001325703    | 24504326                               | this study, Yuan 2014                            |
| <i>GRIN2A</i> | 817 | Met | Val | Increase | --            | VCV000205659.4  | 28126851, 30544257                     | Chen 2017, Strehlow 2019                         |
| <i>GRIN2A</i> | 818 | Ala | Val | Increase | Likely GoF    | VCV001065504    | --                                     | this study                                       |
| <i>GRIN2B</i> | 413 | Glu | Gly | Decrease | Likely LoF    | VCV000143189    | 24863970, 27839871, 37369021           | Adams 2014, Swanger 2016, Well 2018, Myers 2023  |
| <i>GRIN2B</i> | 461 | Cys | Phe | Decrease | Possible LoF  | VCV000916598    | 27839871, 29511171, 37369021           | Swanger 2016, Fedele 2018, Myers 2023            |
| <i>GRIN2B</i> | 533 | Gly | Asp | Decrease | Likely LoF    | VCV000397525    | 37369021                               | Myers 2023                                       |
| <i>GRIN2B</i> | 540 | Arg | His | Increase | Indeterminant | VCV000162087    | 27839871, 37369021                     | Swanger 2016, Myers 2023                         |
| <i>GRIN2B</i> | 541 | Ser | Gly | Increase | Possible GoF  | VCV001708206    | 37000222, 37369021                     | Xie 2023, Myers 2023                             |
| <i>GRIN2B</i> | 541 | Ser | Arg | Decrease | Likely LoF    | VCV000916601    | 28377535, 37000222, 37369021           | Platzer 2017, Xie 2023, Myers 2023               |
| <i>GRIN2B</i> | 543 | Gly | Arg | Increase | Possible GoF  | VCV000984886    | 37000222                               | Xie 2023                                         |
| <i>GRIN2B</i> | 549 | Ala | Val | Decrease | Likely LoF*   | VCV001723180    | 37000222, 37369021                     | Xie 2023, Myers 2023                             |
| <i>GRIN2B</i> | 550 | Phe | Ser | Decrease | Likely LoF*   | VCV000522093    | 37000222, 37369021                     | Xie 2023, Myers 2023                             |
| <i>GRIN2B</i> | 551 | Leu | Ser | Decrease | Likely LoF*   |                 | 37000222, 37369021                     | Xie 2023, Myers 2023                             |
| <i>GRIN2B</i> | 553 | Pro | Thr | Decrease | Likely LoF    |                 | 37000222, 37369021                     | Xie 2023, Myers 2023                             |
| <i>GRIN2B</i> | 553 | Pro | Leu | Decrease | Likely LoF*   | VCV000039661    | 28095420, 29511171, 37369021           | Ogden 2017, Fedele 2018, Myers 2023              |
| <i>GRIN2B</i> | 555 | Ser | Ile | Decrease | Likely LoF*   | VCV000916602    | 37000222, 37369021                     | Xie 2023, Myers 2023                             |
| <i>GRIN2B</i> | 555 | Ser | Asn | Increase | Likely GoF    | VCV001483642    | 37000222, 37369021                     | Xie 2023, Myers 2023                             |
| <i>GRIN2B</i> | 558 | Val | Ile | Decrease | Likely LoF    | VCV000374243.11 | 28377535, 29681796                     | Platzer 2017; Vyklicky 2018                      |
| <i>GRIN2B</i> | 559 | Trp | Arg | Decrease | Likely LoF*   | VCV000984850    | --                                     | this study                                       |
| <i>GRIN2B</i> | 559 | Trp | Cys | Decrease | Likely LoF*   | --              | --                                     | this study                                       |
| <i>GRIN2B</i> | 607 | Trp | Cys | Increase | Possible GoF  | VCV000916606    | 29681796, 31429998, 37369021           | Vyklicky 2018, Li 2019, Myers 2023               |
| <i>GRIN2B</i> | 607 | Trp | Ser | Increase | Possible GoF  | VCV000828156    | 37369021                               | Myers 2023                                       |
| <i>GRIN2B</i> | 611 | Gly | Val | Increase | Likely GoF    | VCV000205730    | 28377535, 31429998, 37369021           | Platzer 2017, Li 2019, Myers 2023                |
| <i>GRIN2B</i> | 615 | Asn | Lys | Increase | Possible GoF  | VCV000916607    | 28377535, 31429998, 37369021           | Platzer 2017, Li 2019, Myers 2023                |
| <i>GRIN2B</i> | 615 | Asn | Ile | Increase | Possible GoF  | VCV000162086    | 29511171, 29681796, 31429998, 37369021 | Fedele 2018, Vyklicky 2018, Li 2019, Myers 2023  |
| <i>GRIN2B</i> | 616 | Asn | Lys | Increase | Possible GoF  | VCV000916608    | 28377535, 31429998, 37369021           | Platzer 2017, Li 2019, Myers 2023                |
| <i>GRIN2B</i> | 616 | Asn | Ile | Increase | Likely GoF    | --              | --                                     | this study                                       |
| <i>GRIN2B</i> | 616 | Asn | Ser | Increase | Possible GoF  | VCV000843669    | --                                     | this study                                       |
| <i>GRIN2B</i> | 620 | Val | Met | Increase | Possible GoF  | VCV000205710    | 31429998, 37369021                     | Li 2019, Myers 2023                              |
| <i>GRIN2B</i> | 639 | Ala | Val | Increase | Possible GoF  | VCV000208749    | 25356970, 26795593, 28377535, 38538865 | Farwell 2015, Helbig 2016, Platzer 2017, Xu 2023 |
| <i>GRIN2B</i> | 641 | Ile | Thr | Increase | Indeterminant | VCV000985189    | 38538865                               | Xu 2023                                          |
| <i>GRIN2B</i> | 652 | Ala | Gly | Increase | Likely GoF    | VCV000245714    | 38538865                               | Xu 2023                                          |
| <i>GRIN2B</i> | 652 | Ala | Pro | Decrease | Likely LoF*   | VCV000452873.2  | 38538865                               | Xu 2023                                          |
| <i>GRIN2B</i> | 654 | Met | Ile | Increase | Possible GoF  | --              | --                                     | this study                                       |
| <i>GRIN2B</i> | 654 | Met | Val | Increase | Possible GoF  | --              | --                                     | this study                                       |
| <i>GRIN2B</i> | 655 | Ile | Phe | Increase | Indeterminant | VCV000916612    | 28377535, 38538865                     | Platzer 2017, Xu 2023                            |
| <i>GRIN2B</i> | 682 | Arg | His | Increase | Possible GoF  | VCV000268209    | 37369021                               | Myers 2023                                       |
| <i>GRIN2B</i> | 689 | Gly | Cys | Decrease | Likely LoF*   | --              | 34212862                               | Kellner 2021                                     |

|               |     |     |     |                 |                     |                 |                              |                                         |
|---------------|-----|-----|-----|-----------------|---------------------|-----------------|------------------------------|-----------------------------------------|
| <b>GRIN2B</b> | 689 | Gly | Ser | <b>Decrease</b> | <b>Likely LoF</b>   | VCV000224818    | 34212862, 37369021           | Kellner 2021, Myers 2023                |
| <b>GRIN2B</b> | 691 | Thr | Ala | <b>Decrease</b> | <b>Likely LoF*</b>  | VCV000561023    | --                           | this study                              |
| <b>GRIN2B</b> | 691 | Thr | Ile | <b>Decrease</b> | <b>Likely LoF*</b>  | --              | --                           | this study                              |
| <b>GRIN2B</b> | 693 | Arg | Ser | <b>Increase</b> | <b>Likely GoF</b>   | VCV000916586    | 37369021                     | Myers 2023                              |
| <b>GRIN2B</b> | 695 | Ile | Thr | <b>Decrease</b> | <b>Likely LOF</b>   | VCV000234790    | 37369021                     | Myers 2023                              |
| <b>GRIN2B</b> | 695 | Ile | Ser | <b>Decrease</b> | <b>Likely LOF</b>   | VCV000432191    | 37369021                     | Myers 2023                              |
| <b>GRIN2B</b> | 696 | Arg | His | <b>Increase</b> | <b>Likely GoF</b>   | VCV000489393    | 27839871, 37369021           | Swanger 2016, Myers 2023                |
| <b>GRIN2B</b> | 696 | Arg | Cys | <b>Increase</b> | <b>Likely GoF</b>   | VCV002574431.1  | --                           | this study                              |
| <b>GRIN2B</b> | 706 | Met | Val | <b>Decrease</b> | <b>Possible LOF</b> | VCV000374226    | 37369021                     | Myers 2023                              |
| <b>GRIN2B</b> | 717 | Ala | Glu | <b>Decrease</b> | <b>Likely LoF*</b>  | --              | --                           | this study                              |
| <b>GRIN2B</b> | 746 | Cys | Trp | <b>Decrease</b> | <b>Likely LoF</b>   | VCV001694662    | --                           | this study                              |
| <b>GRIN2B</b> | 797 | Leu | Phe | <b>Decrease</b> | <b>Likely LoF</b>   | --              | --                           | this study                              |
| <b>GRIN2B</b> | 807 | Glu | Lys | <b>Decrease</b> | <b>Likely LoF</b>   | VCV000916587    | 37369021                     | Myers 2023                              |
| <b>GRIN2B</b> | 810 | Ser | Asn | <b>Increase</b> | <b>Likely GoF</b>   | VCV000800894    | 37369021                     | Myers 2023                              |
| <b>GRIN2B</b> | 813 | Leu | Val | <b>Increase</b> | <b>Likely GoF</b>   | VCV000864861    | 35393335                     | this study, Brock 2023                  |
| <b>GRIN2B</b> | 818 | Met | Arg | <b>Decrease</b> | <b>Likely LoF*</b>  | VCV000411110    | --                           | this study                              |
| <b>GRIN2B</b> | 818 | Met | Thr | <b>Increase</b> | <b>Possible GoF</b> | VCV000245960    | 28377535, 35393335           | this study, Platzer 2017, Brock 2023    |
| <b>GRIN2B</b> | 820 | Gly | Ala | <b>Decrease</b> | <b>Likely LOF</b>   | VCV000208643.19 | 34008892, 30217972, 28377535 | Marinakis 2021, Amin 2018, Platzer 2017 |
| <b>GRIN2B</b> | 820 | Gly | Glu | <b>Decrease</b> | <b>Likely LoF*</b>  | VCV000580700    | 28377535, 29681796, 30217972 | Platzer 2017, Vyklicky 2018, Amin 2018  |
| <b>GRIN2B</b> | 821 | Val | Phe | <b>Decrease</b> | <b>Possible LoF</b> | VCV000984853    | 37369021                     | Myers 2023                              |
| <b>GRIN2B</b> | 824 | Met | Arg | <b>Decrease</b> | <b>Likely LoF*</b>  | VCV000561027    | 28377535, 29681796           | Platzer 2017, Vyklicky 2018             |
