# Supplementary material for: Distances from ligands as main predictive features for pathogenicity and functional effect of variants in NMDA receptors
Source: bioRxiv or medRxiv preprint supplement (doi:10.1101/2024.05.06.24306939), 2024-05-08
Supplement: Supplementary file [file media-3.pdf]

**Supplemental Table S5: Data describing missense variant effects on NMDAR properties.**

| <i>GRIN</i> -variant          | Glutamate EC <sub>50</sub><br>(95% CI), $\mu$ M | Glycine EC <sub>50</sub><br>(95% CI), $\mu$ M | Mg <sup>2+</sup> IC <sub>50</sub> (95%<br>CI), $\mu$ M | P <sub>OPEN</sub>   | $\tau_{WEIGHT}$<br>(ms) | Surface<br>Expression<br>(% of total) |
|-------------------------------|-------------------------------------------------|-----------------------------------------------|--------------------------------------------------------|---------------------|-------------------------|---------------------------------------|
| <b>WT 1/2A*</b>               | <b>3.6</b>                                      | <b>1.2</b>                                    | <b>20</b>                                              | <b>0.23</b>         | <b>60</b>               | <b>100</b>                            |
| <b>1-K531R/2A</b>             | 9.9 (8.9, 11.1)                                 | 2.7 (2.4, 2.9)                                | 18 (14, 24)                                            | 0.098 $\pm$ 0.0052  | 26 $\pm$ 4.1            | 113 $\pm$ 12                          |
| <b>1-Q556R/2A</b>             | 1.1 (0.64, 1.9)                                 | 0.42 (0.34, 0.51)                             | 29 (22, 39)                                            | 0.48 $\pm$ 0.018    | 200 $\pm$ 49            | 113 $\pm$ 3.1                         |
| <b>1-P557R/2A<sup>a</sup></b> | 0.37 (0.34, 0.41)                               | 0.088 (0.080, 0.10)                           | 28 (20, 39)                                            | 0.026 $\pm$ 0.0016  | 395 $\pm$ 32            | 39 $\pm$ 0.099                        |
| <b>1-G638S/2A</b>             | 3.3 (2.6, 4.1)                                  | 1.1 (0.95, 1.3)                               | 83 (58, 119)                                           | 0.24 $\pm$ 0.010    | 54 $\pm$ 5.6            | 60 $\pm$ 16                           |
| <b>1-C744G/2A</b>             | 0.71 (0.51, 1.0)                                | 1.3 (1.1, 1.5)                                | 26 (21, 30)                                            | 0.33 $\pm$ 0.011    | 163 $\pm$ 16            | 101 $\pm$ 6.7                         |
| <b>1-A806E/2A</b>             | 0.28 (0.23, 0.33)                               | 0.073 (0.055, 0.10)                           | 18 (16, 21)                                            | 0.30 $\pm$ 0.011    | 441 $\pm$ 64            | 116 $\pm$ 1.6                         |
| <b>1-R844L/2A</b>             | 2.4 (2.1, 2.9)                                  | 0.88 (0.76, 1.0)                              | 54 (46, 63)                                            | 0.35 $\pm$ 0.022    | 98 $\pm$ 13             | 140 $\pm$ 10                          |
| <b>WT 1/2A*</b>               | <b>3.2</b>                                      | <b>1.2</b>                                    | <b>26</b>                                              | <b>0.17</b>         | <b>54</b>               | <b>100</b>                            |
| <b>2A-R518C</b>               | 3600 (3260, 4000)                               | 1.5 (1.2, 1.9)                                | 21 (17, 25)                                            | tstm                | tstm                    | 32 $\pm$ 4.0                          |
| <b>2A-T690M</b>               | 5900 (4700, 7300)                               | 1.4 (1.1, 1.7)                                | 29 (24, 34)                                            | tstm                | tstm                    | 30 $\pm$ 5.2                          |
| <b>2A-I694T<sup>b</sup></b>   | 9.7 (9.0, 11)                                   | 0.87 (0.63, 1.2)                              | 28 (20, 40)                                            | 0.13 $\pm$ 0.0060   | 45 $\pm$ 3.7            | 72 $\pm$ 8.0                          |
| <b>2A-R695Q</b>               | 0.32 (0.28, 0.35)                               | 1.2 (1.1, 1.4)                                | 15 (11, 21)                                            | 0.20 $\pm$ 0.01     | 257 $\pm$ 34            | 77 $\pm$ 23                           |
| <b>2A-A716D</b>               | tstm                                            | tstm                                          | tstm                                                   | tstm                | tstm                    | n.a.                                  |
| <b>2A-K772E<sup>b</sup></b>   | 4.8 (4.4, 5.2)                                  | 1.3 (1.2, 1.5)                                | 13 (8.5, 21)                                           | 0.14 $\pm$ 0.005    | 47 $\pm$ 5.6            | 18 $\pm$ 2.0                          |
| <b>2A-L812M<sup>c</sup></b>   | 0.40 (0.34, 0.45)                               | 0.14 (0.12, 0.15)                             | 36 (32, 41)                                            | 0.40 $\pm$ 0.0098   | 443 $\pm$ 47            | 85 $\pm$ 13                           |
| <b>2A-M817V<sup>d</sup></b>   | 0.28 (0.20, 0.39)                               | 0.14 (0.11, 0.17)                             | 60 (41, 87)                                            | 0.93 $\pm$ 0.070    | 632 $\pm$ 103           | 100 $\pm$ 14                          |
| <b>2A-A818V</b>               | 1.6 (1.3, 2.0)                                  | 0.38 (0.32, 0.45)                             | 40 (32, 50)                                            | 0.713 $\pm$ 0.022   | 86 $\pm$ 9.6            | 155 $\pm$ 55                          |
| <b>WT 1/2B*</b>               | <b>1.3</b>                                      | <b>0.3</b>                                    | <b>23.0</b>                                            | <b>0</b>            | <b>716</b>              | <b>100</b>                            |
| <b>2B-G543R</b>               | 0.22 (0.19, 0.26)                               | 0.094 (0.08, 0.12)                            | 26 (22, 31)                                            | 0.013 $\pm$ 0.0023  | 3530 $\pm$ 223          | 110 $\pm$ 11                          |
| <b>2B-V558I</b>               | 1.0 (0.84, 1.2)                                 | 0.39 (0.33, 0.47)                             | 24 (20, 30)                                            | 0.0066 $\pm$ 0.001  | 376 $\pm$ 110           | 103 $\pm$ 7.5                         |
| <b>2B-W559C</b>               | tstm                                            | tstm                                          | tstm                                                   | tstm                | tstm                    | 74 $\pm$ 12                           |
| <b>2B-W559R</b>               | tstm                                            | tstm                                          | tstm                                                   | tstm                | tstm                    | 81 $\pm$ 1.9                          |
| <b>2B-N616I</b>               | 0.22 (0.14, 0.35)                               | 0.039 (0.28, 0.55)                            | >5000                                                  | 0.016 $\pm$ 0.0032  | 2240 $\pm$ 254          | 82 $\pm$ 25                           |
| <b>2B-N616S</b>               | 0.91 (0.81, 1.0)                                | 0.23 (0.20, 0.28)                             | >5000                                                  | 0.010 $\pm$ 0.00052 | 1140 $\pm$ 58           | 83 $\pm$ 8.1                          |
| <b>2B-M654I</b>               | 0.059 (0.045, 0.078)                            | 0.034 (0.022, 0.055)                          | 42 (30, 59)                                            | 0.032 $\pm$ 0.0060  | 5720 $\pm$ 647          | 67 $\pm$ 11                           |
| <b>2B-M654V</b>               | 0.057 (0.042, 0.077)                            | 0.087 (0.062, 0.12)                           | 38 (29, 50)                                            | 0.14 $\pm$ 0.020    | 1410 $\pm$ 97           | 25 $\pm$ 8.4                          |
| <b>2B-T691A</b>               | 1230 (1090, 1380)                               | 0.46 (0.44, 0.48)                             | 28 (21, 36)                                            | tstm                | tstm                    | 96 $\pm$ 19                           |
| <b>2B-T691I</b>               | 2700 (2490, 2920)                               | 0.39 (0.32, 0.46)                             | 22 (16, 29)                                            | tstm                | tstm                    | 119 $\pm$ 25                          |
| <b>2B-R696C</b>               | 0.22 (0.19, 0.25)                               | 0.23 (0.20, 0.28)                             | 28 (22, 34)                                            | 0.023 $\pm$ 0.0020  | 1880 $\pm$ 151          | 96 $\pm$ 25                           |
| <b>2B-A717E</b>               | tstm                                            | tstm                                          | tstm                                                   | tstm                | tstm                    | 41 $\pm$ 17                           |
| <b>2B-C746W</b>               | 0.87 (0.72, 1.1)                                | 2.7 (2.2, 3.3)                                | 19 (16, 23)                                            | 0.013 $\pm$ 0.00089 | 597 $\pm$ 55            | 47 $\pm$ 8.2                          |
| <b>2B-L797F</b>               | 39 (26, 59)                                     | 0.67 (0.61, 0.74)                             | 24 (20, 28)                                            | 0.051 $\pm$ 0.0031  | 38 $\pm$ 4.0            | 89 $\pm$ 5.6                          |
| <b>2B-L813V<sup>e</sup></b>   | 0.27 (0.23, 0.31)                               | 0.021 (0.013, 0.034)                          | 24 (21, 29)                                            | 0.021 $\pm$ 0.0023  | 1360 $\pm$ 101          | 83 $\pm$ 7.2                          |
| <b>2B-M818R</b>               | tstm                                            | tstm                                          | tstm                                                   | tstm                | tstm                    | 39 $\pm$ 8.0                          |
| <b>2B-M818T<sup>e</sup></b>   | 0.42 (0.30, 0.58)                               | 0.13 (0.10, 0.19)                             | 15 (8.5, 26)                                           | 0.15 $\pm$ 0.015    | 1680 $\pm$ 440          | 63 $\pm$ 17                           |
| <b>2B-G820A</b>               | 1.3 (0.96, 1.9)                                 | 0.32 (0.26, 0.39)                             | 22 (19, 24)                                            | 0.011 $\pm$ 0.0016  | 205 $\pm$ 10            | 84 $\pm$ 7.6                          |

\* WT values were recorded on the same day for every variant, and the mean for each parameter is given

Mean values for variant receptors are given with 95% confidence intervals determined from the log EC50 or IC50 values, or with SEM. All data are from 8-23 oocytes, 4-15 HEK cells, or 2-10 independent surface expression

tstm indicates the response was too small to measure, n.a. indicates data is not available

a Part of the data set were reanalyzed from data in Ogden et al. 2017

b Part of the data set were reanalyzed from data in Swanger et al. 2016

c Part of the data set were reanalyzed from data in Yuan et al. 2014

d Part of the data set were reanalyzed from data in Chen et al. 2017

e Part of the data set were reanalyzed from data in Brock et al. 2023
