# Supplementary material for: Distances from ligands as main predictive features for pathogenicity and functional effect of variants in NMDA receptors
Source: bioRxiv or medRxiv preprint supplement (doi:10.1101/2024.05.06.24306939), 2024-05-08
Supplement: Supplementary file [file media-5.pdf]

**Supplemental Table S3. Summary of functional status caused by GRIN variants with partial analysis**

| Gene  | Residue Position | WT Amino Acid | Variant Amino Acid | Glutamate Potency | Glycine Potency | Mg <sup>2+</sup> IC50 | $\tau_{\text{WEIGHT}}$ | P <sub>OPEN</sub> | Classification | ClinVar         | PMID               | Reference                         |
|-------|------------------|---------------|--------------------|-------------------|-----------------|-----------------------|------------------------|-------------------|----------------|-----------------|--------------------|-----------------------------------|
| GRIN1 | 552              | Asp           | Glu                | H (0.31)          | M (0.41)        | 1.0                   | H (0.23)               | H (0.1)           | Decrease       | VCV000487500.2  | 28095420           | this study, Ogden 2017            |
| GRIN1 | 617              | Ser           | Cys                | 0.89              | 0.92            | H (5.9)               | M (0.43)               | H (0.47)          | Increase       | VCV002579484.1  | 34884460           | this study, Santos-Gómez 2021     |
| GRIN1 | 618              | Gly           | Arg                | 1.0               | 0.67            | H (>40)               | n.a.                   | H (0.48)          | Increase       | VCV000981271.3  | 31429998           | Li 2019                           |
| GRIN1 | 674              | Asn           | Ile                | 1.4               | 1.0             | M (1.5)               | n.a.                   | M (1.7)           | Increase       | VCV001163324.5  | 29365063           | this study, Fry 2018              |
| GRIN1 | 688              | Ser           | Tyr                | M (0.48)          | H (0.0016)      | 0.73                  | n.a.                   | H (0.13)          | Decrease       | VCV000981272.5  | 33122756           | this study, Skrenkova 2020        |
| GRIN1 | 732              | Asp           | Glu                | n.a.              | n.a.            | H (3.3)               | 0.85                   | n.a.              | Increase       | --              | 34884460           | Santos-Gómez 2021                 |
| GRIN1 | 744              | Cys           | Tyr                | H (3.9)           | M (1.8)         | M (1.7)               | H (4.8)                | M (1.8)           | Increase       | VCV000539840.4  | 35393335           | Brock 2022                        |
| GRIN1 | 794              | Arg           | Gln                | H (5.9)           | M (1.6)         | M (1.5)               | H (3.6)                | M (1.6)           | Increase       | VCV000435376.7  | 29365063           | this study, Fry 2018              |
| GRIN1 | 805              | Pro           | Leu                | H (6.1)           | H (5.7)         | 1.0                   | H (3.4)                | 1.3               | Increase       | VCV000658023.10 | 34884460           | this study, Santos-Gómez 2021     |
| GRIN1 | 814              | Ala           | Asp                | H (0.34)          | H (0.33)        | 1.29                  | H (0.43)               | H (0.14)          | Decrease       | VCV000430264.2  | 34884460           | this study, Santos-Gómez 2021     |
| GRIN1 | 815              | Gly           | Val                | M (0.62)          | 0.75            | H (3.3)               | H (0.43)               | H (0.052)         | Decrease       | --              | 30217972           | this study, Amin 2018             |
| GRIN1 | 815              | Gly           | Arg                | H (0.26)          | M (0.5)         | H (5.5)               | H (0.48)               | H (0.06)          | Decrease       | VCV001452432.3  | 27164704, 30217972 | this study, Lemke 2016; Amin 2018 |
| GRIN1 | 817              | Phe           | Leu                | M (0.49)          | H (0.4)         | 1.30                  | M (0.52)               | H (0.2)           | Decrease       | VCV000487504.3  | 30217972           | this study, Amin 2018             |
| GRIN1 | 818              | Met           | Val                | n.a.              | n.a.            | H (2.9)               | 0.96                   | n.a.              | Increase       | --              | 34884460           | Santos-Gómez 2021                 |

  

| Gene   | Residue Position | WT Amino Acid | Variant Amino Acid | Glutamate Potency | Glycine Potency | Mg <sup>2+</sup> IC50 | $\tau_{\text{WEIGHT}}$ | P <sub>OPEN</sub> | Classification | ClinVar         | PMID     | Reference                |
|--------|------------------|---------------|--------------------|-------------------|-----------------|-----------------------|------------------------|-------------------|----------------|-----------------|----------|--------------------------|
| GRIN2A | 184              | Ile           | Ser                | M (1.5)           | 0.76            | 1.4                   | H (4.8)                | n.a.              | Increase       | VCV001325858.1  | 28611597 | this study, Sibarov 2017 |
| GRIN2A | 424              | Pro           | His                | 1.3               | 1.2             | H (2.8)               | n.a.                   | n.a.              | Increase       | VCV000641065.27 |          | this study               |
| GRIN2A | 431              | Arg           | Ser                | 1.4               | M (1.9)         | 1.3                   | n.a.                   | n.a.              | Increase       | VCV001487019.6  |          | this study               |
| GRIN2A | 498              | Gly           | Ser                | M (0.51)          | 0.72            | 1.3                   | n.a.                   | n.a.              | Decrease       | VCV000930862.12 |          | this study               |
| GRIN2A | 614              | Asn           | Ser                | M (1.8)           | M (1.6)         | H (4.6)               | n.a.                   | M (1.7)           | Increase       | VCV000224990.10 | 31429998 | Li 2019                  |
| GRIN2A | 674              | His           | Gln                | 0.89              | 1.2             | H (3.5)               | n.a.                   | n.a.              | Increase       | VCV001016692.7  |          | this study               |
| GRIN2A | 685              | Val           | Gly                | H (0.01)          | 0.72            | n.a.                  | H (0.43)               | n.a.              | Decrease       | VCV000205655.2  | 27839871 | this study, Swanger 2016 |
| GRIN2A | 733              | Ala           | Thr                | H (0.05)          | 0.76            | 0.92                  | n.a.                   | n.a.              | Decrease       | VCV000205658.13 |          | this study               |
| GRIN2A | 776              | Asp           | Tyr                | M (0.43)          | 1.1             | 1.0                   | n.a.                   | n.a.              | Decrease       | VCV000952584.9  |          | this study               |
| GRIN2A | 803              | Glu           | Lys                | H (0.24)          | 0.72            | M (0.53)              | n.a.                   | n.a.              | Decrease       | VCV001190362.2  |          | this study               |

| Gene   | Residue Position | WT Amino Acid | Variant Amino Acid | Glutamate Potency | Glycine Potency | Mg <sup>2+</sup> IC50 | $\tau_{\text{WEIGHT}}$ | P <sub>OPEN</sub> |          | ClinVar         | PMID               | Reference                   |
|--------|------------------|---------------|--------------------|-------------------|-----------------|-----------------------|------------------------|-------------------|----------|-----------------|--------------------|-----------------------------|
| GRIN2B | 499              | Gly           | Val                | H (0.14)          | 0.75            | 1.2                   | n.a.                   | 0.88              | Decrease | VCV001285574.1  |                    | this study                  |
| GRIN2B | 514              | Thr           | Ala                | H (0.011)         | M (1.5)         | 1.2                   | n.a.                   | n.a.              | Decrease | VCV000916599.1  |                    | this study                  |
| GRIN2B | 525              | Phe           | Val                | H (0.28)          | 0.68            | 1.3                   | n.a.                   | n.a.              | Decrease | VCV000916600.1  |                    | this study                  |
| GRIN2B | 558              | Val           | Ile                | 1.2               | 0.9             | 0.9                   | M (0.53)               | H (0.06)          | Decrease | VCV000374243.12 | 28377535, 29681796 | Platzer 2017; Vyklicky 2018 |
| GRIN2B | 687              | Pro           | Leu                | H (0.2)           | 0.87            | 1.0                   | n.a.                   | n.a.              | Decrease | VCV000205711.2  |                    | this study                  |
| GRIN2B | 742              | Arg           | Ile                | H (5.9)           | M (1.9)         | 1.0                   | n.a.                   | n.a.              | Increase | VCV000523382.2  |                    | this study                  |
| GRIN2B | 751              | Ile           | Leu                | H (0.32)          | H (0.3)         | 1.3                   | n.a.                   | n.a.              | Decrease | VCV000245954.2  |                    | this study                  |
| GRIN2B | 754              | Gly           | Arg                | 1.3               | M (0.44)        | 1.2                   | n.a.                   | n.a.              | Decrease | VCV000444285.23 |                    | this study                  |
| GRIN2B | 799              | Gly           | Ser                | H (17)            | M (1.6)         | 1.4                   | n.a.                   | n.a.              | Increase | VCV000373959.3  |                    | this study                  |
| GRIN2B | 819              | Ala           | Thr                | H (2.5)           | H (6.7)         | M (1.7)               | n.a.                   | n.a.              | Increase | VCV000916592.2  | 28377535           | Platzer 2017                |
| GRIN2B | 820              | Gly           | Ala                | 1.0               | 1.0             | 0.91                  | H (0.31)               | H (0.49)          | Decrease | VCV000208643.20 | 30217972           | Amin 2018                   |

Fold change was calculated from ration of fitted parameters for mutant and WT controls recorded o the same day.

All calls were made by criteria of Myers et al., (2023). n.a.indicates data not available.
